# Supplementary material for: Coupling Genetic and Chemical Microbiome Profiling Reveals Heterogeneity of Archaeome and Bacteriome in Subsurface Biofilms That Are Dominated by the Same Archaeal Species
Source: PubMed Central journal article supplement (PMC4074051; doi:10.1371/journal.pone.0099801), 2014-06-27

**Figure S1:** Geographical map illustrating the sampling locations Sippenauer Moor (SM, 1) and Muehlbacher Schwefelquelle, Isling (MSI, 1) in Germany and in their relative position to Regensburg and the Danube (“Donau”).

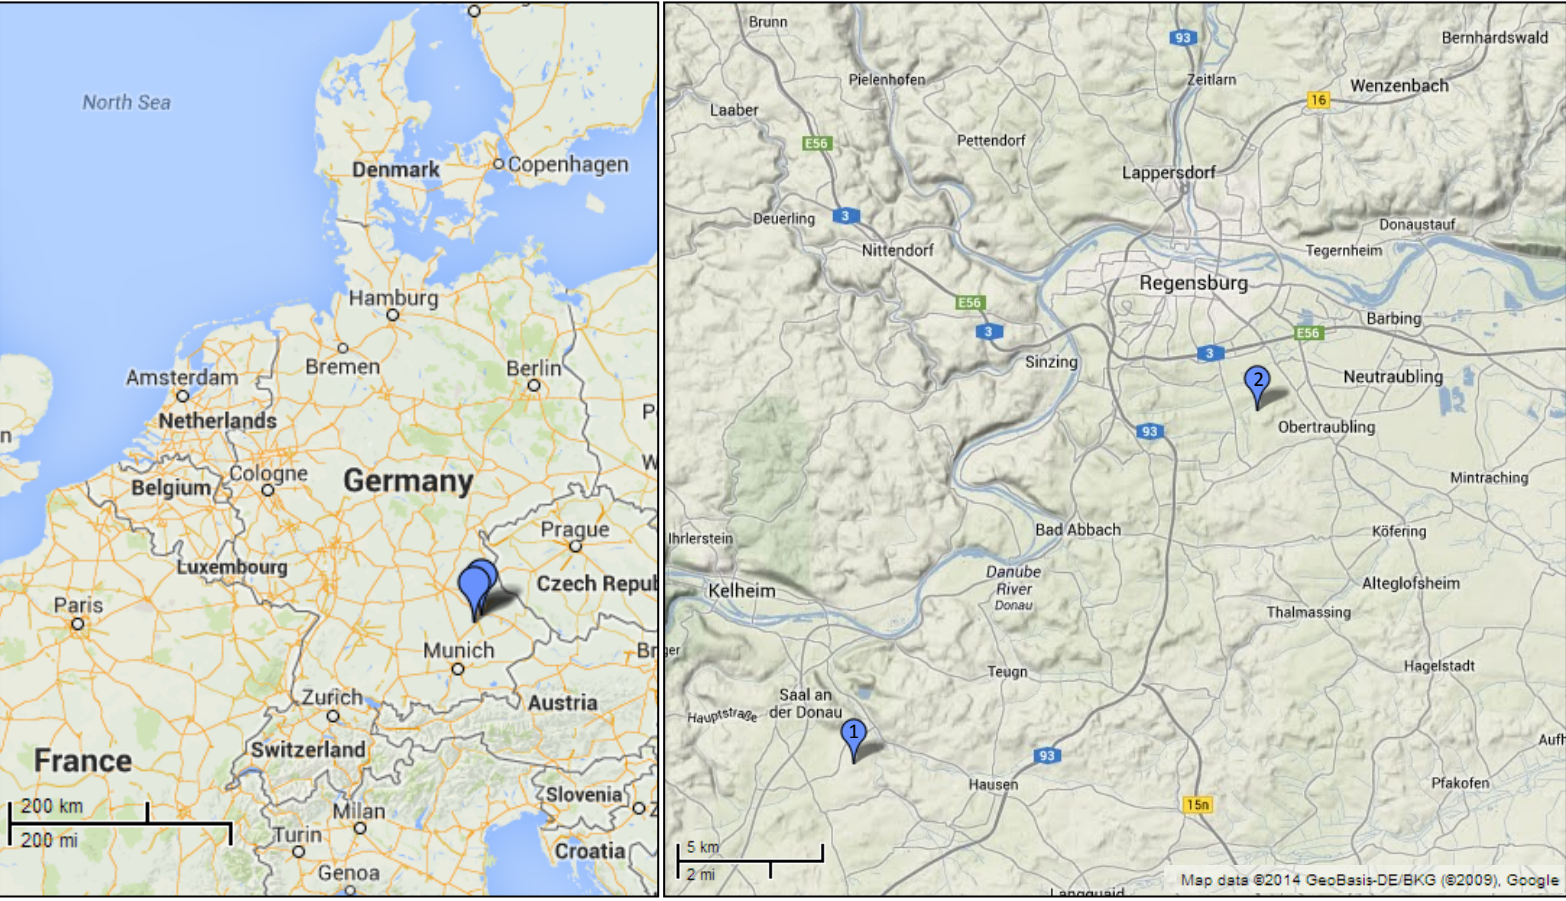

Supplement: pone.0099801.s001.pdf [file pone.0099801.s001.pdf]
