# Supplementary material for: Coupling Genetic and Chemical Microbiome Profiling Reveals Heterogeneity of Archaeome and Bacteriome in Subsurface Biofilms That Are Dominated by the Same Archaeal Species
Source: PubMed Central journal article supplement (PMC4074051; doi:10.1371/journal.pone.0099801), 2014-06-27

**Figure S3:** EOTUs found to be significantly different between the two biofilm samples (#290) by a Welch test. **A:** Heatmap displaying the 290 eOTUs. Value = HybScore. For false discovery analysis due to multiple testing the reader is referred to Figure S3. **B:** Hierarchical clustering based on average neighbour (weighted UniFrac of 290 eOTUs) showing a separation of the microbiomes based on geographic location. Interestingly, SOPC samples which were not subject to significance filtering group together with SM-BF samples indicating similar microbiomes.

A

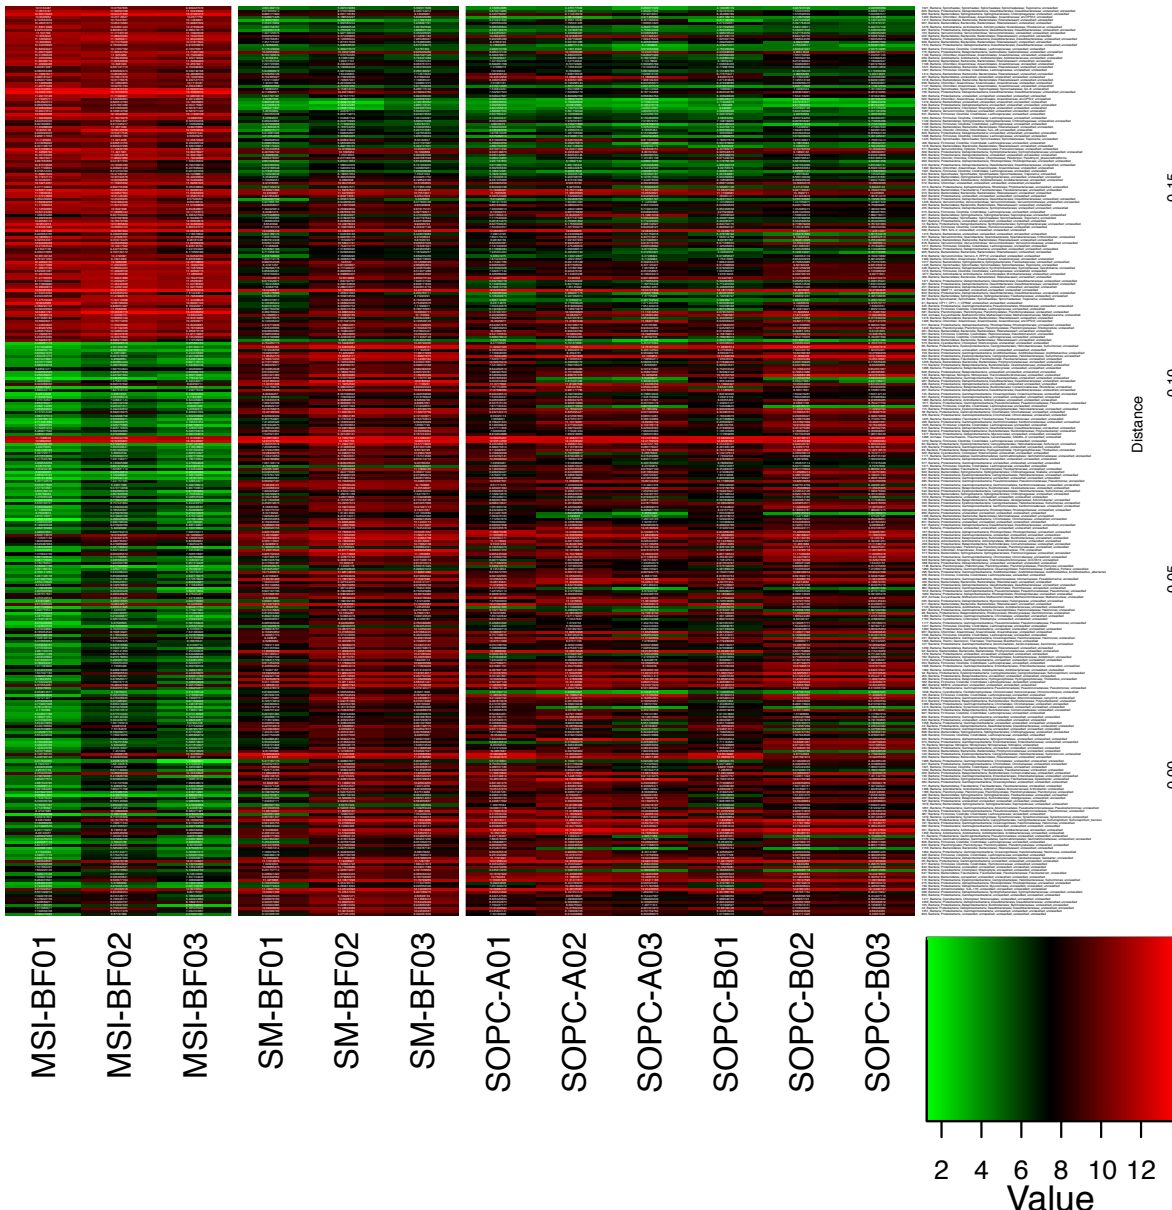

B

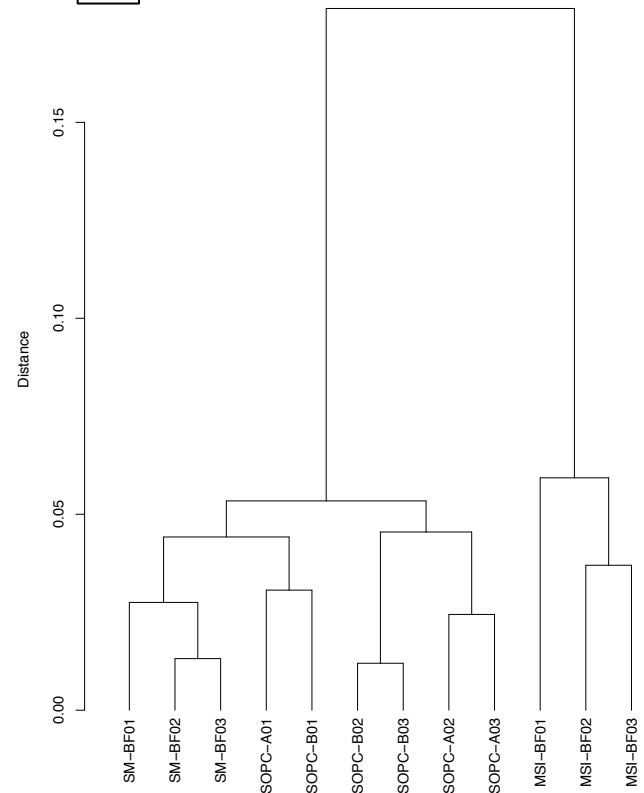

Supplement: pone.0099801.s003.pdf [file pone.0099801.s003.pdf]
