# Supplementary material for: Coupling Genetic and Chemical Microbiome Profiling Reveals Heterogeneity of Archaeome and Bacteriome in Subsurface Biofilms That Are Dominated by the Same Archaeal Species
Source: PubMed Central journal article supplement (PMC4074051; doi:10.1371/journal.pone.0099801), 2014-06-27

**Figure S5:** Differences of the two biofilm-microbiomes: Top 12 of the most significant taxa found between the two biofilm types MSI-BF and SM-BF (Welch test; for details see Fig. S2).

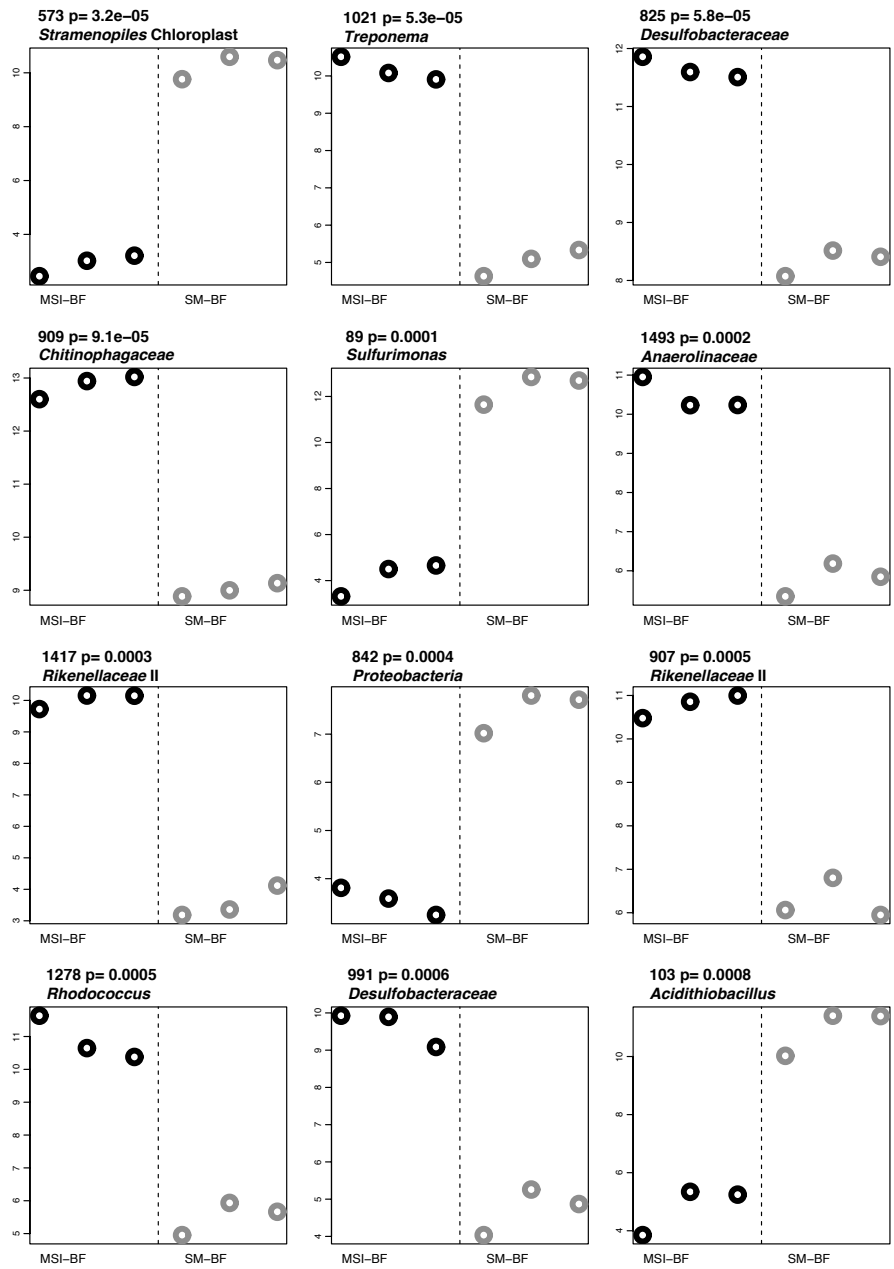

Supplement: pone.0099801.s005.pdf [file pone.0099801.s005.pdf]
