# Supplementary material for: Coupling Genetic and Chemical Microbiome Profiling Reveals Heterogeneity of Archaeome and Bacteriome in Subsurface Biofilms That Are Dominated by the Same Archaeal Species
Source: PubMed Central journal article supplement (PMC4074051; doi:10.1371/journal.pone.0099801), 2014-06-27

**Figure S7:** Univariate analyses of SR-FTIR absorption band ratios. A-B) The comparison of total proteins and lipids to the carbohydrate amount can provide information on the overall composition of the matrix that composes these communities; we can observe that in both SM-BF and MSI-BF the amount of proteins and lipids is higher in respect to SM-SOPC, implying that the anaerobic biofilm frameworks are richer in proteins and in our case can accounts for the abundance of *hami* proteins, whereas the aerobic environment of the SOPC promotes a polysaccharide rich framework. C-D) Evaluation of nitrogen and sulfur compounds shed light on the metabolic imprints in the immediate geochemical surroundings at the time of sampling. A comparison of the ratio of  $\text{NO}_2^-$  to  $\text{NO}_3^-$  ( $\text{NO}_2^-/\text{NO}_3^-$ ) and the ratio of  $\text{S}^{2-}$  to  $\text{SO}_4^{2-}$  ( $\text{S}^{2-}/\text{SO}_4^{2-}$ ). These analyses revealed spatial variations in the microbial reduction/oxidation processes.

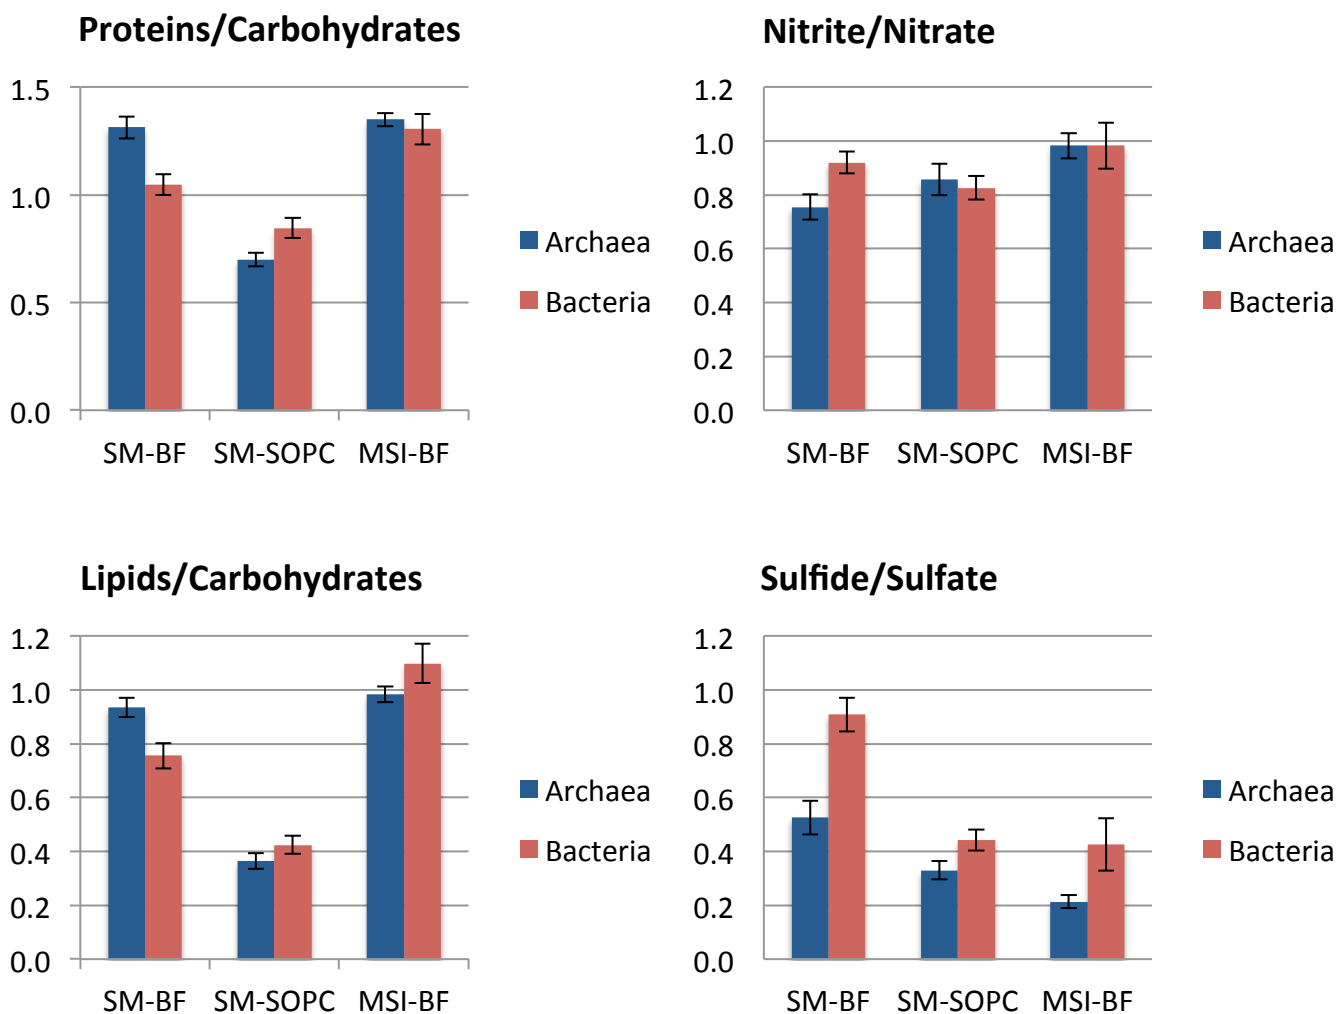

Supplement: pone.0099801.s007.pdf [file pone.0099801.s007.pdf]
