# Supplementary material for: Coupling Genetic and Chemical Microbiome Profiling Reveals Heterogeneity of Archaeome and Bacteriome in Subsurface Biofilms That Are Dominated by the Same Archaeal Species
Source: PubMed Central journal article supplement (PMC4074051; doi:10.1371/journal.pone.0099801), 2014-06-27

**Figure S8:** Southern blot analysis of metagenomic DNA collected from two sampling sites where the SM1 Euryarchaeon occurs. A different restriction pattern was observed for metagenomic DNA from the two sampling sites indicating a difference of SM1 Euryarchaea on genome level. Remarkably, the same pattern was retrieved for the string-of-pearl-community as it was retrieved for the biofilm from the same sampling site. This supports the hypothesis of the biofilm being the precursor of the SOPC.

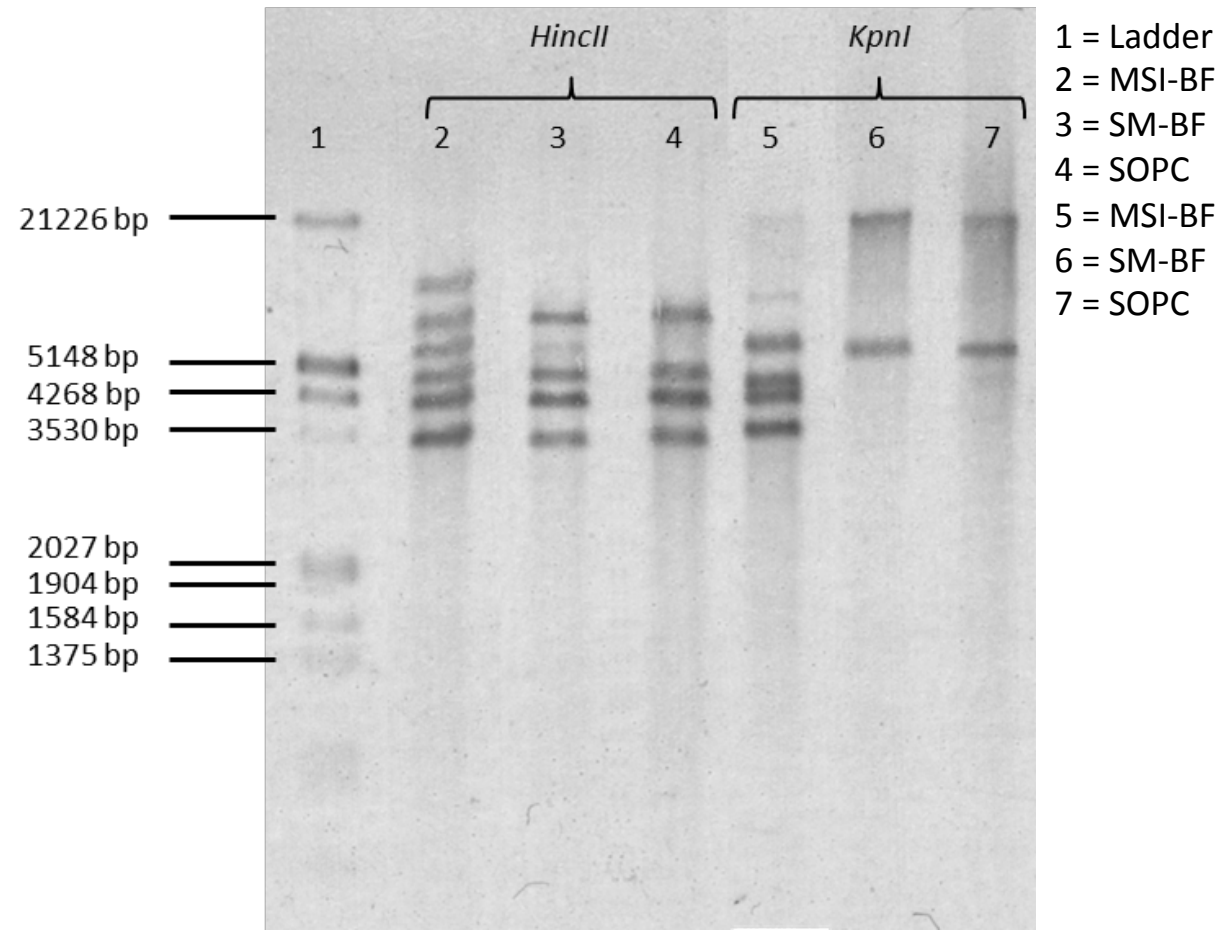

Supplement: pone.0099801.s008.pdf [file pone.0099801.s008.pdf]
