# Supplementary material for: Coupling Genetic and Chemical Microbiome Profiling Reveals Heterogeneity of Archaeome and Bacteriome in Subsurface Biofilms That Are Dominated by the Same Archaeal Species
Source: PubMed Central journal article supplement (PMC4074051; doi:10.1371/journal.pone.0099801), 2014-06-27
Supplement: pone.0099801.s010.pdf [file pone.0099801.s010.pdf]

**Table S1:** Analysis of chemical compounds measured in spring waters from Sippenauer Moor (SM) and Mühlbacher Schwefelquelle (MSI). Data taken from Rudolph et al., 2004.

| Chemical compound                           | SM<br>(compound in mg/l) | MSI<br>(compound in mg/l) |
|---------------------------------------------|--------------------------|---------------------------|
| SO <sub>4</sub> <sup>2-</sup>               | 31                       | 16                        |
| S <sub>2</sub> O <sub>3</sub> <sup>2-</sup> | 16                       | 14                        |
| SO <sub>3</sub> <sup>-</sup>                | <1                       | <1                        |
| NO <sub>3</sub> <sup>-</sup>                | <1                       | <1                        |
| NO <sub>2</sub> <sup>-</sup>                | <0.02                    | <0.02                     |
| NH <sub>4</sub> <sup>+</sup>                | 0.13                     | 0.33                      |
| Na <sup>+</sup>                             | 14                       | 21                        |
| Cl <sup>-</sup>                             | 13                       | 22                        |
| PO <sub>4</sub> <sup>3-</sup>               | <0.05                    | <0.05                     |
| Ca <sup>2+</sup>                            | 67                       | 79                        |
| Mg <sup>2+</sup>                            | 20                       | 27                        |
| K <sup>+</sup>                              | 3.0                      | 6.1                       |
| Mn                                          | 0.019                    | 0.081                     |
| Ni                                          | <0.01                    | <0.01                     |
| As                                          | <0.002                   | <0.002                    |
| Al                                          | <0.05                    | <0.05                     |
| Sb                                          | <0.003                   | <0.003                    |
| B                                           | 0.10                     | 0.13                      |
| Cu                                          | <0.005                   | <0.005                    |
| Se                                          | <0.003                   | <0.003                    |
| Zn                                          | <0.05                    | <0.05                     |
| Fe                                          | 0.025                    | 0.021                     |
| CO <sub>2</sub> , dissolved                 | 19                       | 32                        |
