# Supplementary material for: Coupling Genetic and Chemical Microbiome Profiling Reveals Heterogeneity of Archaeome and Bacteriome in Subsurface Biofilms That Are Dominated by the Same Archaeal Species
Source: PubMed Central journal article supplement (PMC4074051; doi:10.1371/journal.pone.0099801), 2014-06-27
Supplement: pone.0099801.s011.pdf [file pone.0099801.s011.pdf]

**Table S2:** Overview of multivariate statistics performed on the bacterial microbiome and on the archaeal microbiome. Entire microbiome is used for finding significantly eOTUs between sample groups (Welch-test). "+" = positive, "-" negative  
 HC-AN refers to hierarchial clustering based on average neighbour.

| Factor               |                | Hydrogeological location | Appearance | Groups                | SM           | MSI-SOPC      | Biofilms       |     |
|----------------------|----------------|--------------------------|------------|-----------------------|--------------|---------------|----------------|-----|
| Bins                 |                | MSI   SM                 | BF   SOPC  | MSI-BF   SM-BF   SOPC | SM-BF   SOPC | MSI-BF   SOPC | MSI-BF   SM-BF |     |
| Sample counts        |                | 3   9                    | 6   6      | 3   3   6             | 3   6        | 3   6         | 3   3          |     |
| Bacterial microbiome | NMDS distinct  | +                        | -          | -                     | -            | +             | +              |     |
|                      | HC-AN distinct | +                        | -          | -                     | -            | +             | +              |     |
| Archaeal microbiome  | NMDS distinct  | -                        | +          | -                     | +            | +             | -              |     |
|                      | HC-AN distinct | -                        | -          | -                     | -            | -             | -              |     |
| Entire microbiome    |                | Diff. eOTU count         | 512        | 480                   | 522          | 248           | 550            | 290 |
